# Supplementary material for: Both Two CtACO3 Transcripts Promoting the Accumulation of the Flavonoid Profiles in Overexpressed Transgenic Safflower
Source: Frontiers journal article supplement (doi:10.3389/fpls.2022.833811), 2022-04-06
Supplement: Table_2.xlsx [file Table_2.xlsx]

## Sheet: Sheet1
Table S2 Proteins interact with CtACO3-2 by Y2H
No.	sequence	blast-name
1	NNNNNNNNNNNNNNNNNNNNNNNNACGTACCAGATTACGCTCATATGACAAGTTTGTACAAAAAAGTTGGAAATCTCGAG AATAACAACTCCACGACCCTAACCAACGGGGTTCGGGTATCGCACGCAAGGTGCTCCACCCTCGCCATGGGTCTACACAT CGACGTGGAGAACACAGGAAACGTCGACGGGACCCACACCGTGATGGTATTCTCGAGCCCGCCAGAAGGAAAATGGGCCA CAAACAAGCAACTGGTGGGGTTTCAGAAGGTCCACGTGGCGGCCGGTGGGGTACAACGGGTGGCAATTGACCTTCATGTG TGCAAACACTTGAGTGTGGTGGACAAATTTGGGATCCGAAGGGTTCCAATGGGTGAACACACTCTTCATATTGGT…	beta-D-xylosidase 1-like
2	NNNNNNNNNNNNNNNNNNTACGACGTACCNGATTACGCTCATATGACAAGTTTGTACAAAAAAGTTGGAGGGCCATGGCC GAGTTGCTGCAAAATAAAGAAGCCATGTCCAAAGTACAAGCAGAGTTGAAGTTCGAAAGTAACTCCAACATTATAACCGA ATCTGATCAATTTTCCAAGTTCCCTTATCTAAATGCCTGTATAAAAGAAACTCTAAGATTACATCCTCCGGCACCTCTTC TAATCCCTCGTCGTGCTTCCGAGACTTGTGAGGTTATGAACTATACGATCCCTAAGAATACCCAAGTATTTATCAATGTT TGGGCAATCGGCCGAGATCCAAAAATTTGGGAGGACCCTCTCTCATTTAAACCCGAAAGATTTCTTGGCTTGGAT…	(S)-N-methylcoclaurine 3'-hydroxylase isozyme 2
3	NNNNNNNNNNNNNNNNNNNTACGACGTACCNGATTACGCTCATATGACAAGTTTGTACAAAAAAGTTGGAAATGATTTTC ATATTTATCAAAATGCAAATACTGTATTCTCTATGGCTAATACCTTTGATCGTACTTCACGTGTTGGCCCAAAGGCTTTT GTTAGTGAGTATGCTGTGACAGGAGATGATGCTGGTAAAGGAAGTCTTTTAGCAGCACTGGCAGAAGCTGCGTTCCTTAT TGGCTTAGAAAAGAACAGTGATATCGTTGAAATGGCAAGCTATGCACCTTTGTTTGTGAATACCAATGACAGACGGTGGA ATCCAGACGCAATAGTTTTTGATTCTTCTCAGGCGTATGGTACGCCAAGTTATTACATGCAACACTTTTTCTCAG…	alpha-L-arabinofuranosidase 1-like
4	NNNNNNNNNNNNNNNNNNNTACGACGTACCNGATTACGCTCATATGACAAGTTTGTACAAAAAAGTTGGACGTGATGGGG AAGAAGGTTATCCTGGAGATCTTTCCGTCACCGCAACTTACACTCTTACTTCAGCAACCACATTAAGACTCGACATGGAA GCAGTTCCCGAGAATAAGCCGACACCCGTTAACTTAGCTCAACACACCTACTGGAATCTCGCCGGCCACAATTCCGGTCC CATTCTCAACCATTCTGCCCAGATTTGGGCAAAACACATCACGCCCGTGGACCAACACACGATCCCGACCGGCGAGATCA AACCCGTCGCAGGAACTCCGTTCGACTTCACCAAGGAGAAGAAAATCGGCACTTCGATCCACGAGGTCGGGTTAG…	aldose 1-epimerase
5	NNNNNNNNNNNNNNNNCCNNTACGACGTACCNNATTACGCTCATATGACAAGTTTGTACAAAAAAGTTGGTGAGGTGANT GGAGTCTCTAGGCTCTTCAGGAATGGTACTGGTTGTGGAGCATGTTATCAGGTTAGGTGCAAGTCTCCCAAGTGTTGCAG TGAAGATGGTGTGAAAGTGGTGGTGACGGACCACGGTGAAGGAGACAACACGGATTTCATCATGACCGTCCGTGCCTACA CGAAACTCGCTCGTCCAGGATTGGCCGCCGAACTAATTTCATATGGGGTGGTCGACATTGAATACAAGAGGATTCCTTGC CAATATCCCGGCTATAATCTCATGTTCAAAGTTCATGAGCACAGTAAATTCCCTCAGTATCTTGCACTCATCGCT…	expansin-like B1
6	NNNNNNNNNNNNNNNNCCNTACGACGTACCNGATTACGCTCATATGACAAGTTTGTACAAAAAAGTTGGACATGCCGGAA ACAAGCTTGCCATGCAGGAGTTTATGATTCTCCCTGTTGGCGCCTCAAGCTTTAAGGAAGCCATGAAGATGGGTGTTGAA GTGTATCACCACTTGAAGTCTGTGATCAAGAAGAAGTATGGTCAGGATGCAACAAATGTTGGTGATGAAGGTGGCTTTGC TCCCAATATTCAGGAAAACAAGGAAGGTCTTGAATTACTCAAGACAGCAATTGCTAAGGCTGGATACACCGGAAAGGTTG TCATCGGAATGGATGTTGCTGCATCTGAATTTTATGGAAGTGACAAGACCTATGATTTGAACTTCAAGGAAGAGA…	enolase 1-like
7	NNNNNNNNNNNNNNNNNNNNNNNNNNGNACNNNATTACNGCNTCATATGACAAGTTTGTACAAAAAAGTTGGAACAGAGA TGGGGAAAGGTCCAGGTCTCTATCCCGATATTGGCAAAAAAGCCAGAGATCTTCTGTACAGGGATTACCAAAGCGACCAT AAGGTCTCTATCACCACCTATACCGCCAACGGAGTTGCCATTACTGCATCAGGAGCTAAGAAAGGTGAGTTGATTTTGGC AGATGTCAACACTAAACTGATCAACAAAAACATCACCACTGATGTCAAAGTGGACACTAACTCAAAGCTATGCACAACTG TCACCATCGATGAAGCTGCACCTGGATTGAAGACCATCTTCAGCTTTGTTGTTCCTGATCAGAGATCTGGAAAGG…	mitochondrial outer membrane protein
8	NNNNNNNNNNNNNNNCNNTACGACGTACCANATTACGCTCATATGACAAGTTTGTACAAAAAAGTTGGAAGGGGACAACT TTGTACAAAAAAGTTGGAAGGGGACAACTTTGTACAAAAAAGTTGGAAGGGGACAACTTTGTACAAAAAAGTTGGAAGGG GACAACTTTGTACAAAAAAGTTGGAAGATAGGGATCTGTTTTCGGCCGATGATAAAATGGGGGATGCAGAGTTCGACTTC AAGCCGTTCTTGGAAGCAGTAAGGATGCGTTTGAGCGATGATCTCCCAAACAACACGATCATCACAACTGTGAGGCCAAC GAGGACCAACTGCTTAGCTGAAGAAAGCTACATAACGTGGACCGACGGCCGAGTTATCCAAAACATGGTTCTTAG…	C2-DOMAIN ABA-RELATED 4-like
9	NNNNNNNNNNNNNNNNNNNNNACGACGTACCNNATTACGCTCATATGACAAGTTTGTACAAAAAAGTTGGCGACGAGTCC NCCCAGTCCAAGTTCCAGCAGGAGAAGCCATGGTCCAACGACCCTCACTACTTCAAACGAGTCAAGGTCTCGGCCCTGGC GCTGCTCAAGATGGTGGTCCATGCCCGCTCCGGTGGGACCATCGAGGTCATGGGGCTGATGCAAGGGAAGACCGACGGAG ATGCGATCATCGTGATGGACGCCTTTGCTCTGCCGGTGGAAGGGACGGAGACTAGGGTTAATGCGCAGGCGGATGCGTAT GAGTATATGGTGGATTACTCGCAGACGAATAAGCAGGCAGGAAGGTTAGAGAATGTTGTTGGGTGGTACCATTCT…	COP9 signalosome complex subunit 5a-like
10	NNNNNNNNNNNNNCNNTACGACGTACCNGATTACGCTCATATGACAAGTTTGTACAAAAAAGTTGGGGACGTGACTGNNG TCTCTAGGCTCTTCAGGAATGGTACTGGTTGTGGAGCCCGCCGTCNGGGTAGGTGCTCCTCCCCCAAGTGTTGNAGCGAA AATGGAGCGAACGTGGGGGGGACCGAACGCGGAGAAGGAGACTACAGGGATTTCGTCNTGACCGTCCGTGCCTACACAAA ACTAGCANNTCCNCAATTGNCCGCCGAACTTCNTTCNNANGNGGTGGTCGACATTGCTTACGAGAGGAGTCCTTGCCCAT CTCCCGGCGAGGNCCCCGTGTACACACCTCATGAACACGATGCATTCCCTCAATATCATGCACTCGTCGCTATAT…	NSF attachment protein-like
11	NNNNNNNNNGNNNNNNNNNNTACNANGTANNNATTACGCTCATATGACAAGTTTGTACAAAAAAGTTGGAACAAATGGAG ATGACATCGTGGGTTGGGATGTCGAAACCGATGATCATTCTTGCACTCTACAAGAAGCCTTCCAAAAGGTCAACCCTTGT TTGGGTTTCAACATTGAGTTGAAGTTTGATGATTACATCGTCTATGATCAACTCTATCTCACCCATGTCCTCCAAATCAT CCTCAAAGTCGTATCCGAAAACGCCCATCAAAGATCTGTCATCTTCTCAACCTTCCAGCCTGATGCAGCCTTGGTTATGA AGAAGCTTCAGCACATATACCCTGTGTACTTCTTGACGAATGGAGGAACCGAGTTGTTCGATGATGTGCGAATGA…	glycerophosphodiester phosphodiesterase GDPD1
12	NNNNNNNNNNNNNNNNNNNTANNNNNNACNNNATNNNNCTCATATGAGNNGTTTNTACAAAAAAGTTGGANGNNNNNNNN CCAACCTTGATCACATTACGCCAGATGCACCNGCCGACAGCGACAACACGGACGGAGTTCACATCAAGCACGTANACGGG CTCAACATCNCGAATTCAAACATGAAGACCGGTGACGATTGCGTTTCTATTGGAGATGGAACCAGGAACGTCCACATCGA GAAATTGACCTGTGGACCCGGCCACGGCATCAGCATCGGGAGCTTGGGCAGATAGGCAAATGAACAACCGGTACAAGGAA TCTGGGTCAAGAACTGCACCATCACCGGAACCACCAACGGAGTCAGGATCAAGACCTGGATTAATTCTACCCCGG…	polygalacturonase-like
