# Supplementary material for: Both Two CtACO3 Transcripts Promoting the Accumulation of the Flavonoid Profiles in Overexpressed Transgenic Safflower
Source: Frontiers journal article supplement (doi:10.3389/fpls.2022.833811), 2022-04-06
Supplement: Table_3.XLSX [file Table_3.XLSX]

## Sheet: Sheet1
Table S3 Proteins interact with CtCSN5a by Y2H
No.	sequence	blast-name
1	NNNNNNNNNNNNNNNNTACGACGTACCNGATTACGCTCATATGACAAGTTTGTACAAAAAAGTTGGTCAAGGAATAAATA TTCGAAACCAAGTCGAGAGGAAATGGGCTCTTGGTCTCCAGTCTCGAGCGCATCCTCGTGAGATAATGACGGAAGTTCTC AAAGCGTTGCAAGAACTGAACGTGTGTTGGAAAAAGATTGGCCACTACAACATGAAATGTCGGTGGGTCCCGGGAGTTCC AGGCCATCATCGAGGCATGATAAATGACTCTATGCAAAGTAACCATTACTTTGGAGACGAGTTGACGATCGTGGAGAACG ACGGTGCCATGACGTCCCCCAATGTCGTCAAGTTTGAAGTCCAGCTTTACAAAACTCGGGAGGACAAGTATCTAC…	SNF1-related protein kinase catalytic subunit alpha KIN10-like
2	NNNNNNNNNNNNNNNNNNACGACGTACCNGATTACGCTCATATGACAAGTTTGTACAAAAAAGTTGGACAGCCAGGAGGC ACTGCTCCACCAAGGGACAAGGTTGTTATCTTAGGCGATGGAAATGTGAAAGTTGTTTTCAACGATGAACATGACATTGG AACCTACACCATTAAAACCGTGGATGACCCAAGAACCCTGAATAAAATCGTTTATATAAAGCCTCCCGGTAACATTTACT CATTCAACGAGGTCGTGTCTTTATGGGAGAAAAAGATCAGCAAAACCTTGGAGCGGGTCCATCTTCCTGAAGACCAAGTT TTGAAGAACATACAAGAATCTCCGGTTCCGCTCAACGTGGTGTTGTCAATTTCTCACTCGATCTTTGTGAAGGGA…	isoflavone reductase homolog TP7-like
3	NNNNNNNNNNNNNNNANNNTACGACGTACCAGATTACGCTCATATGACAAGTTTGTACAAAAAAGTTGGACACGGCCTGC NNNNNGACTCGAAGGACCACCATGGATCAATGGCTATCCAAATCGCAGTCTCGGAAAACGACATGGAAATGGTGAAGCTA CTCGTGCTCAACGGGGCCAATGTGAACGATCACGCCATCAAGAACAAGATTCCGCCCGAGAACTTGAAGGATCTCGTCGC AAAAAGAGAGGTCGGGTACCAAATCACGGTGCCCGATCAAGATCCCGTGATGGAGACCGGCCGGAAAGCGGAGGAGGGTA TTTTGGGAAAATCACAAGGACAATTTGTTGGTAGGGTTAGTATTTACAAAGGGCTTCCTATGGTAAGGAGGAAGA…	potassium channel AKT2/3
4	NNNNNNNNNNNNNNNANNNTATGCAGGAGGAGGAAGATTCCAAGGTTCGTCGATTCGAAACGGAGCCGAGTGAGCTAACCGATACGGTGTTCAACTGCGTTGTACCGTACATACACGACTGCCGTGACCGGAGCTCAGTCTCCTTGGTTTGCCGGAAATGGTGCGAGCTCGACGGCGCCACGCGGAAGCACGTAACCGTCGCCATGTGCTACTCCACGACGCCGTCTCGTCTGCGCCGACGGTTTCCGCTTCTCGAGTCGTTGACCGTGAAGGGGAAGCCACGTGCCGCCATGTTCGAGCTGATTCCGGAGGATTGGGGCGGTCACGTCACCCCATGGGTTCGTGAGATCGTGACTTGTTTGAATTGCTTGAAGTCTATCCATTTCNNNCNNNAAAAAA…	coronatine-insensitive protein 1-like
5	TNNNNNAAANNGTGTACNATACGACGTACCAGATTACGCTCATATGACAAGTTTGTACAAAAAAGTTGGGGGGACAACTT TGAACAAAAAAGTTGGGGTTGCAGCTTCCAAGGCAGGGGGAGGAGGAGGGGCGACCCGGTCTTGCGGGTCGGGTCAATCC GTTTCGACAAGCGGAAGCGTCGGGTCTCCTTCGACCCGGAGTGAATTGGGCATTGTGGGAACCCCTGTTAGTGAGAGCAC GTTTTTGAGGTTGAATCATCTTGATATTCACACTGATAATGCTGGATCTCAAGGGGCAGTTGGTAATAAAAAGAAGAAAC GTGGACAACGTGCAACCGGAGGGGATAAAGGTGGTAGAGGACTCCGTCAATTTAGCATGAAAGTGTGCGAGAAAG…	transcription factor-like protein DPB
6	NNNNNNNNNNNNNNNNNNNTACGACGTANNNGATTACGCTCATATGACAAGTTTGTACAAAAAAGTTGGACACACTCAAA AGTTATCCAACAAGATTCCAATGGCAGGAATTCAAATCAAGCTGTTCGTCGTGCTACTCTGCTCGATCTCTCTCGCATCT CTTACCGATGCCATAGATGTCAAGTATTGCAAAAAGAATAAAGATTATCCCGTCAAGGTCAGTGGAGTTGAGATTACTCC TTACCCGATAGAAAGAGGCACAGATACTACCTTCACTTTGTCGGCCTCTACAGATACACCCATCGTTGGAGGGGACCTTC AGATTGACGTTTCATACTACTTTTTTGGTGTCTATAGCGAGACCAGTGACCTCTGCACTAAGACCGAATGCCCTG…	phosphatidylglycerol/phosphatidylinositol transfer protein DDB
